# Supplementary material for: Clinical Application of Next-Generation Sequencing–Based Panel toBRAFWild-Type Advanced Melanoma Identifies Key Oncogenic Alterations and Therapeutic Strategies
Source: Oxford University Press journal article supplement (doi:10.1158/1535-7163.mct-19-0457), 2019-12-11
Supplement: 15357163mct190457-sup-221492_4_supp_5927058_q1m2wz.pdf [file 15357163mct190457-sup-221492_4_supp_5927058_q1m2wz.pdf]

**Figure S1.**

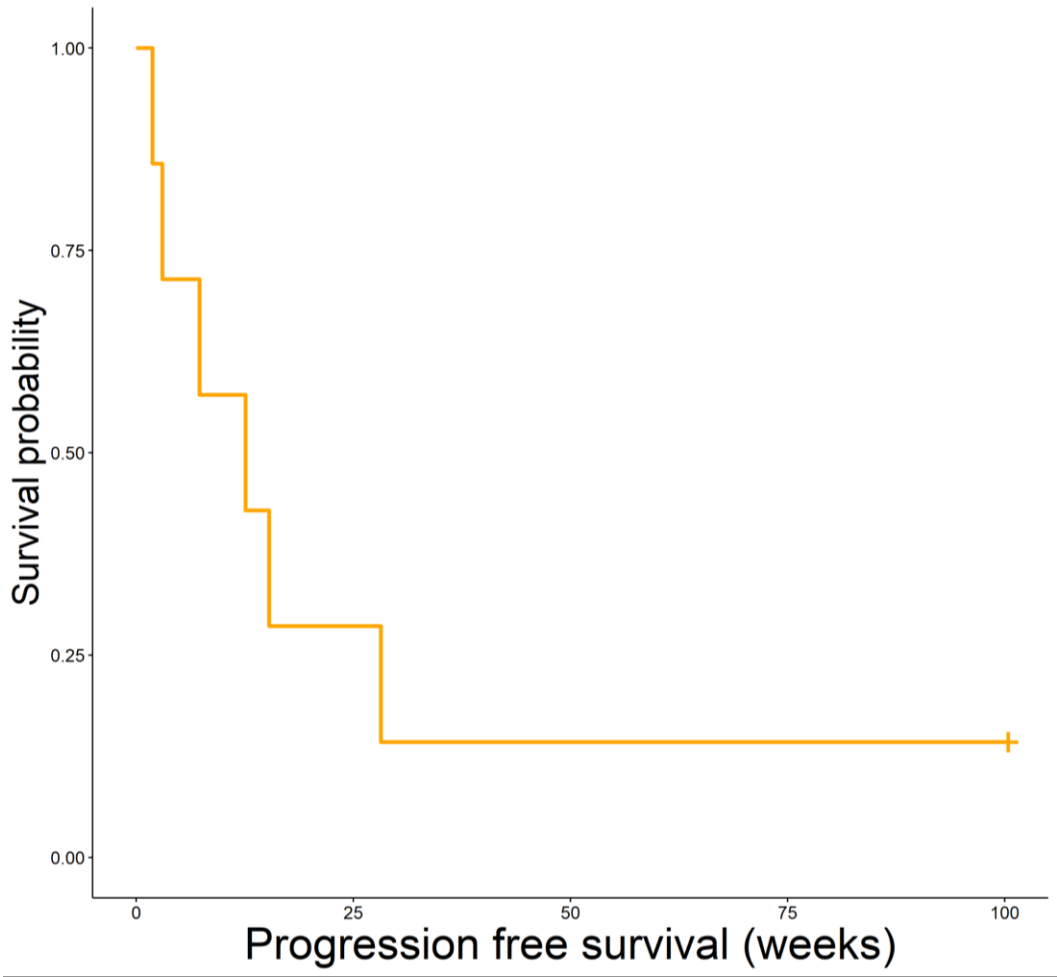

**Figure S1.** Progression-free survival of patients in the clinical trial  
Kaplan-Meier curve shows PFS of 7 patients enrolled in the clinical trial.
